# Supplementary material for: Reactivity of bis[{2,6-(dimethylamino)methyl}phenyl]telluride with Pd(ii) and Hg(ii): isolation of the first Pd(ii) complex of an organotellurenium cation as a ligand
Source: Royal Society of Chemistry journal article supplement (doi:10.1039/c9nj02469g), 2019-01-01
Supplement: c9nj02469g1.pdf [file c9nj02469g1.pdf]

## Electronic Supplementary Information

For

### Reactivity of bis[2,6-(dimethylamino)methyl]phenyl]telluride with Pd(II) and Hg(II): Isolation of the first Pd(II) complex of an organotellurenum cation as a ligand

Anand K. Gupta,<sup>a</sup> Rajesh Deka,<sup>a</sup> Harkesh B. Singh<sup>a\*</sup> and Ray J. Butcher<sup>b</sup>

<sup>a</sup>Department of Chemistry, Indian Institute of Technology Bombay, Powai, Mumbai 400076, India

<sup>b</sup>Department of Chemistry, Howard University, Washington DC 20059, USA

E-mail: [chhbsia@chem.iitb.ac.in](mailto:chhbsia@chem.iitb.ac.in)

---

| <b>Contents</b>                                                    | <b>Page No.</b> |
|--------------------------------------------------------------------|-----------------|
| Packing diagrams of molecules <b>6-9</b>                           | S2-S5           |
| Crystallographic data and structure refinement details             | S6              |
| Bond lengths (Å) and bond angle (°) comparison of crystal data and | S7-S8           |
| Optimized geometry for compounds <b>6-9</b>                        |                 |
| NBO of compound <b>9</b>                                           | S9              |
| Summary of the NPA and NBO on compounds <b>6-9</b>                 | S9              |
| Cartesian coordinates for compounds <b>6-9</b>                     | S10-S15         |

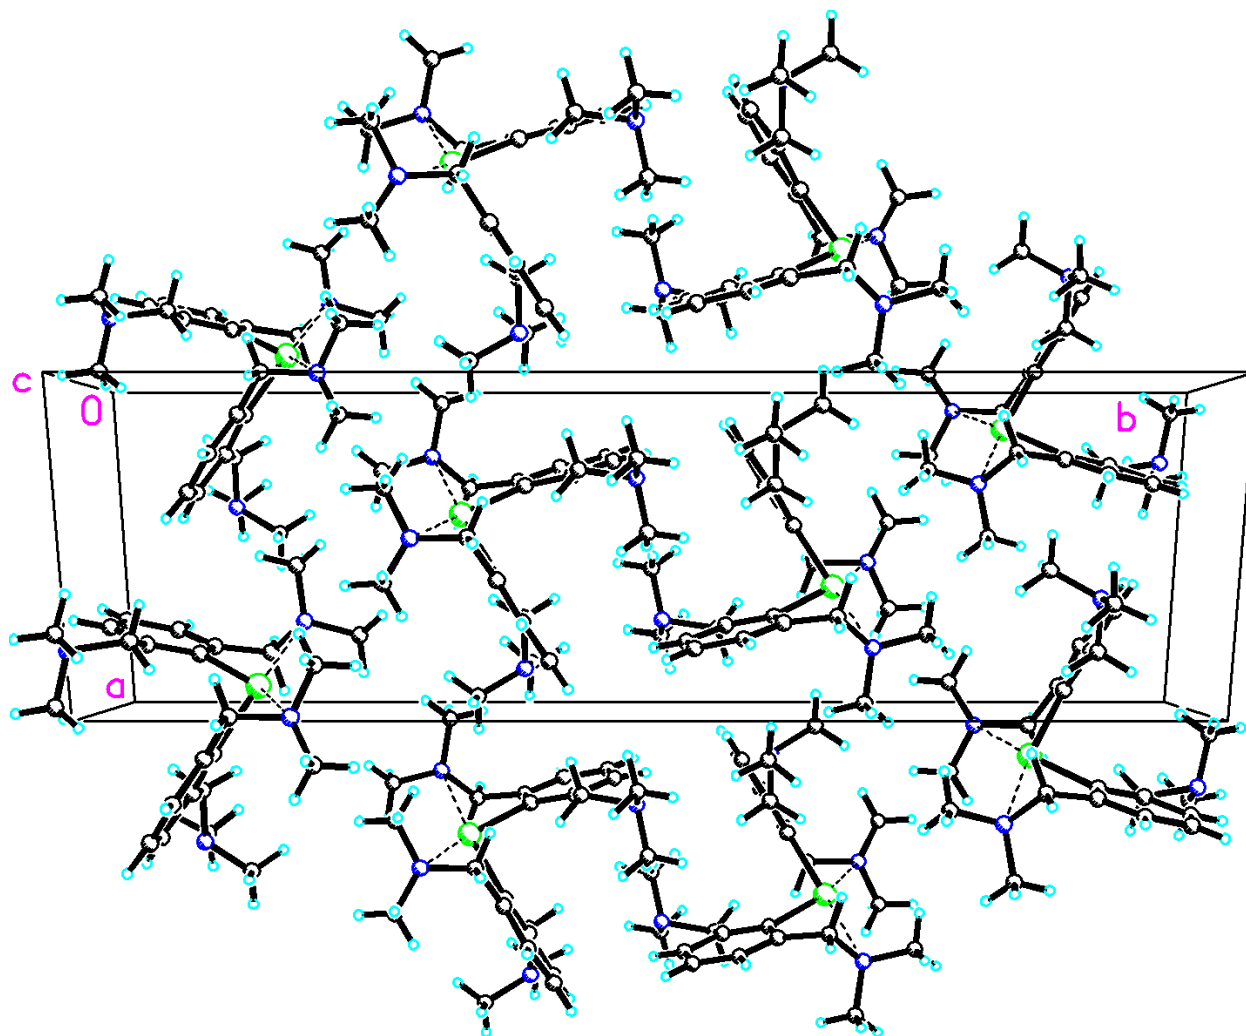

**Fig. S1** Packing diagram of compound **6**.

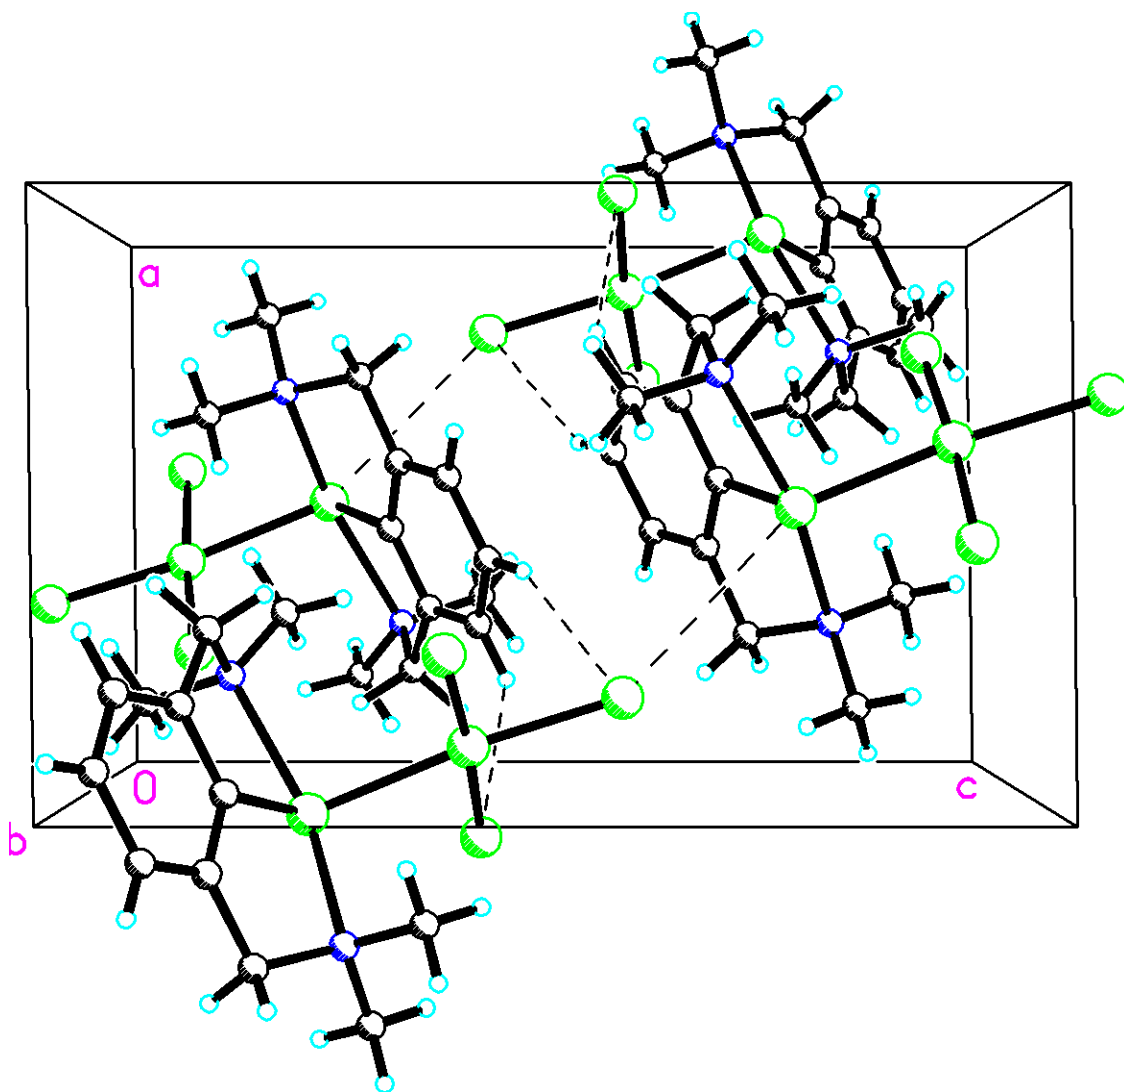

**Fig. S2** Packing diagram of complex 7.

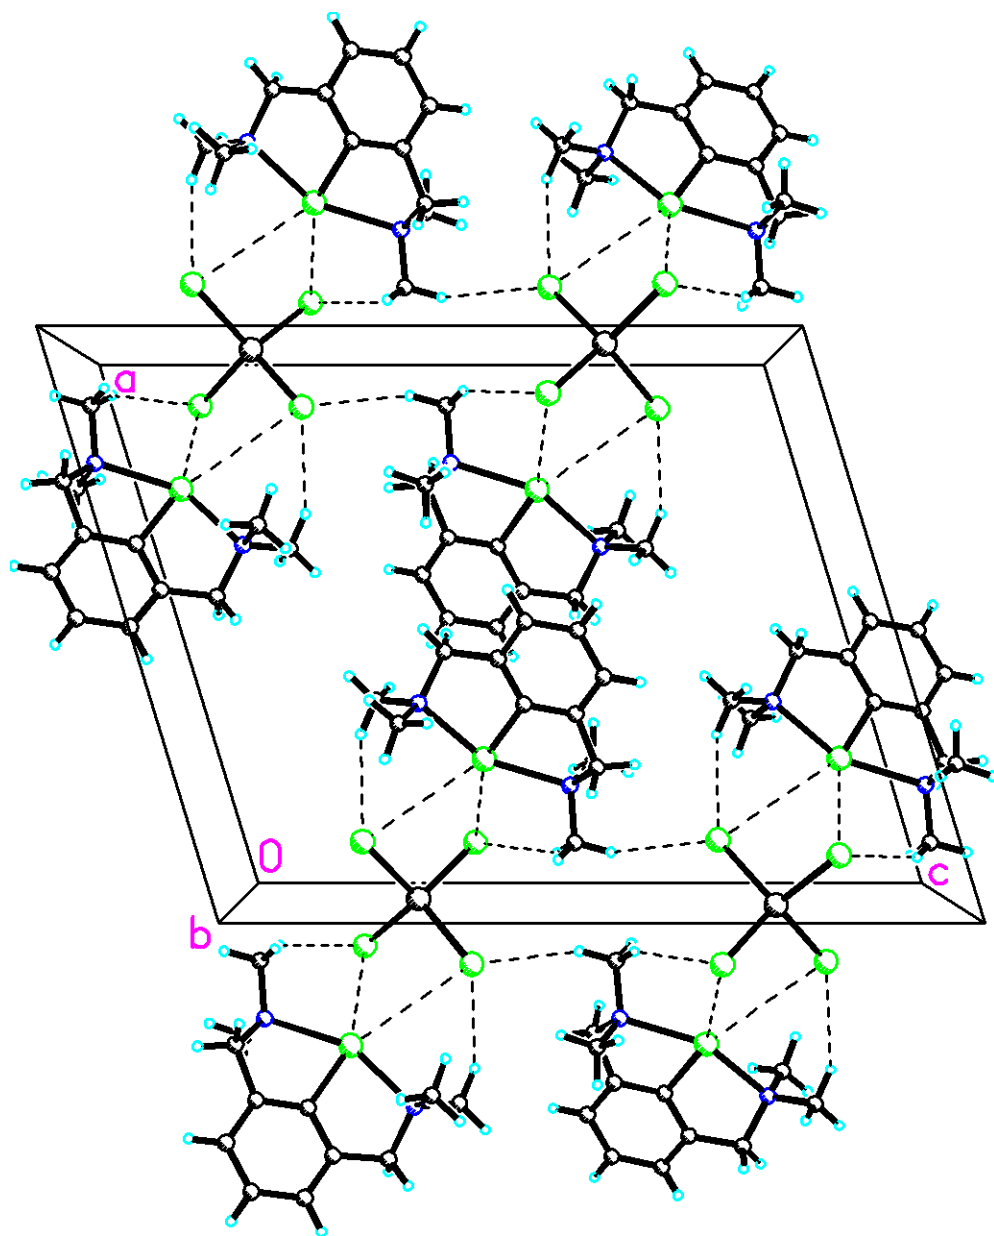

**Fig. S3** Packing diagram of **8**.

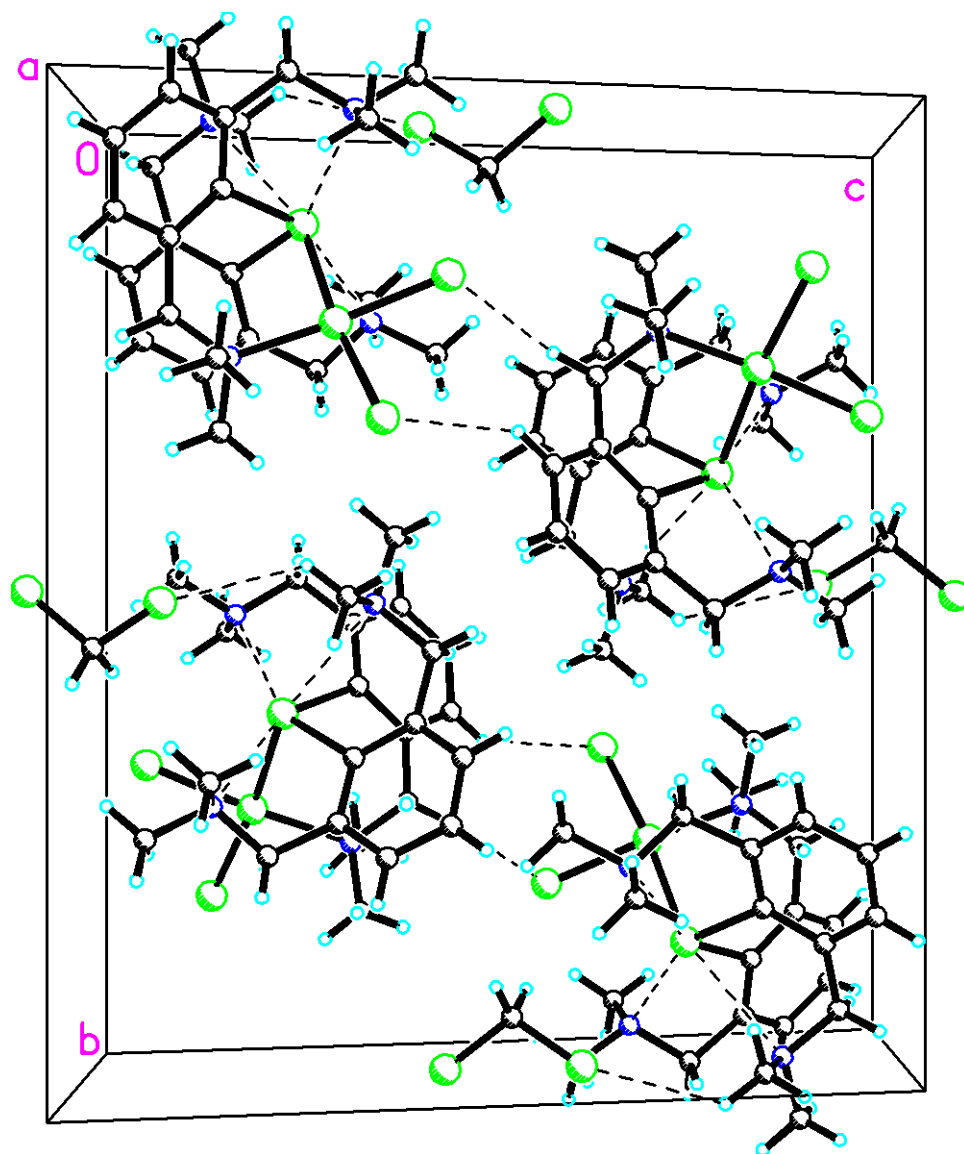

**Fig. S4** Packing diagram of complex 9.

**Table S1** Crystallographic Data and Refinement Details for **6-9**.

| Compound                         | 6                                                 | 7                                                                   | 8                                                                                | 9                                                                                              |
|----------------------------------|---------------------------------------------------|---------------------------------------------------------------------|----------------------------------------------------------------------------------|------------------------------------------------------------------------------------------------|
| Empirical formula                | C <sub>24</sub> H <sub>38</sub> N <sub>4</sub> Te | C <sub>12</sub> H <sub>19</sub> Cl <sub>3</sub> N <sub>2</sub> PdTe | C <sub>24</sub> H <sub>38</sub> Cl <sub>4</sub> HgN <sub>4</sub> Te <sub>2</sub> | C <sub>49</sub> H <sub>78</sub> Cl <sub>6</sub> N <sub>8</sub> Pd <sub>2</sub> Te <sub>2</sub> |
| F. W. (g/mol)                    | 510.18                                            | 531.64                                                              | 980.17                                                                           | 1459.89                                                                                        |
| Crystal system                   | Monoclinic                                        | Monoclinic                                                          | Monoclinic                                                                       | Monoclinic                                                                                     |
| Space group                      | <i>P2<sub>1</sub>/n</i>                           | <i>P2<sub>1</sub>/n</i>                                             | <i>C2/c</i>                                                                      | <i>P2<sub>1</sub>/c</i>                                                                        |
| a (Å)                            | 9.39820(17)                                       | 8.8060(18)                                                          | 15.052(4)                                                                        | 9.3657(2)                                                                                      |
| b (Å)                            | 29.1571(4)                                        | 13.281(3)                                                           | 12.069(3)                                                                        | 18.9012(3)                                                                                     |
| c (Å)                            | 10.11713(16)                                      | 14.315(3)                                                           | 18.453(4)                                                                        | 16.6559(3)                                                                                     |
| α (°)                            | 90                                                | 90                                                                  | 90                                                                               | 90                                                                                             |
| β (°)                            | 114.042(2)                                        | 90.64(3)                                                            | 106.982(3)                                                                       | 103.849(2)                                                                                     |
| γ (°)                            | 90                                                | 90                                                                  | 90                                                                               | 90                                                                                             |
| V (Å <sup>3</sup> )              | 2531.83(8)                                        | 1674.1(6)                                                           | 3206.1(14)                                                                       | 2862.76(10)                                                                                    |
| Z                                | 4                                                 | 4                                                                   | 4                                                                                | 2                                                                                              |
| D(calcd) (Mg/m <sup>3</sup> )    | 1.338                                             | 2.109                                                               | 2.031                                                                            | 1.694                                                                                          |
| F(000)                           | 1048.0                                            | 1016.0                                                              | 1848.0                                                                           | 1452.0                                                                                         |
| Range of 2θ(deg)                 | 6.062 to 150.938                                  | 6.262 to 50.752                                                     | 6.172 to 58.254                                                                  | 4.31 to 62.346                                                                                 |
| Collected reflections            | 9872                                              | 12723                                                               | 4279                                                                             | 29902                                                                                          |
| Final R <sub>1</sub> [I > 2σ(I)] | 0.0294                                            | 0.0174                                                              | 0.0349                                                                           | 0.0202                                                                                         |
| wR2 =                            | 0.0706                                            | 0.0401                                                              | 0.0709                                                                           | 0.0454                                                                                         |
| R (all data) R1                  | 0.0346                                            | 0.0211                                                              | 0.0470                                                                           | 0.0231                                                                                         |
| wR2                              | 0.0748                                            | 0.0409                                                              | 0.0811                                                                           | 0.0465                                                                                         |
| Goodness of fit F <sup>2</sup>   | 1.047                                             | 1.012                                                               | 0.919                                                                            | 1.034                                                                                          |

**Table S2** Bond lengths (Å) and bond angle (°) comparison of crystal data and Optimized geometry for **6-9**.

|            | <b>6</b>   |             |              | <b>7</b>    |             |              |
|------------|------------|-------------|--------------|-------------|-------------|--------------|
|            |            | <b>Exp.</b> | <b>Calc.</b> |             | <b>Exp.</b> | <b>Calc.</b> |
| <b>(Å)</b> | C1A-Te     | 2.140(2)    | 2.186        | C1-Te1      | 2.075(2)    | 2.099        |
|            | C1B-Te     | 2.086(5)    | 2.179        | N2-Te1      | 2.355(2)    | 2.416        |
|            | N2A-Te     | 3.192(3)    | 3.125        | N1-Te1      | 2.337(2)    | 2.396        |
|            | N1B-Te     | 2.975(3)    | 3.083        | Te1-Pd1     | 2.5079(8)   | 2.572        |
| <b>(°)</b> |            |             |              | Pd1-Cl1     | 2.3129(7)   | 2.366        |
|            |            |             |              | Pd1-Cl2     | 2.994(7)    | 2.407        |
|            |            |             |              | Pd1-Cl3     | 2.3535(9)   | 2.440        |
|            | C1A-Te-C1B | 99.0(2)     | 97.84        | C1-Te1-Pd1  | 114.59(6)   | 114.89       |
|            |            |             |              | C1-Te1-N2   | 76.00(7)    | 75.57        |
|            |            |             |              | C1-Te1-N1   | 76.22(8)    | 76.03        |
|            |            |             |              | Te1-Pd1-Cl3 | 172.48(2)   | 173.06       |
|            |            |             |              |             |             |              |

**Table S3** Bond lengths (Å) and bond angle (°) comparison of crystal data and Optimized geometry for **8-9**.

|     | <b>8</b>   |             |              | <b>9</b>    |              |       |
|-----|------------|-------------|--------------|-------------|--------------|-------|
|     |            | <b>Exp.</b> | <b>Calc.</b> | <b>Exp.</b> | <b>Calc.</b> |       |
| (Å) | C1-Te1     | 2.075(4)    | 2.107        | C1A-Te1     | 2.171(1)     | 2.210 |
|     | N1-Te1     | 2.342(4)    | 2.441        | C1-Te1      | 2.142(2)     | 2.182 |
|     | N2-Te1     | 2.347(5)    | 2.417        | N3-Te1      | 3.018(1)     | 3.007 |
|     | Hg-Cl1     | 2.5113(12)  | 2.621        | N4-Te1      | 3.145(1)     | 3.445 |
|     | Hg-Cl2     | 2.4686(13)  | 2.674        | N2-Te1      | 2.942(1)     | 2.932 |
|     |            |             |              | N1-Pd       | 2.127(1)     | 2.214 |
|     |            |             |              | Te1-Pd      | 2.5528(4)    | 2.671 |
|     |            |             |              | Pd-Cl1      | 2.3883(5)    | 2.408 |
|     |            |             |              | Pd-Cl1A     | 2.3156(5)    | 2.364 |
| (°) | C1-Te1-N1  | 75.9(2)     | 74.76        | C1A-Te-Cl   | 95.08(6)     | 96.17 |
|     | C1-Te1-N2  | 75.7(2)     | 75.48        | N1-Pd-Te1   | 96.59(4)     | 96.53 |
|     | Cl1-Hg-Cl2 | 108.83(4)   | 106.92       |             |              |       |
|     |            |             |              |             |              |       |
|     |            |             |              |             |              |       |
|     |            |             |              |             |              |       |
|     |            |             |              |             |              |       |



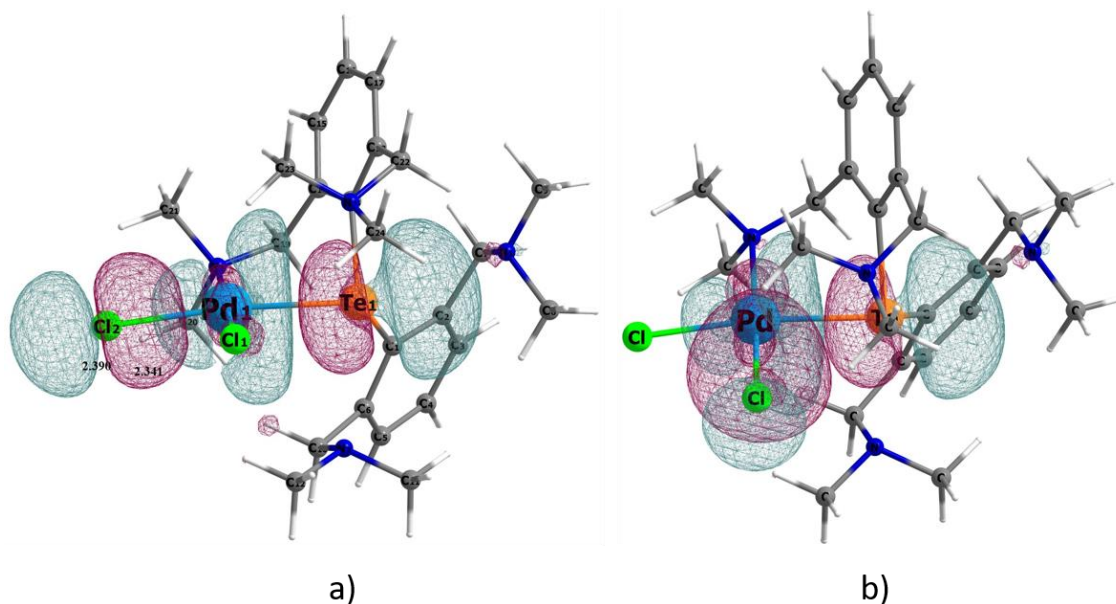

**Fig. S5** NBO plot of complex **9** showing a)  $\sigma(\text{Cl}) \rightarrow \sigma^*(\text{Te-Pd})$  and b)  $\sigma(\text{Cl}) \rightarrow \sigma^*(\text{Te-Pd})$  (isosurface value 0.03).

**Table S4** Summary of the NPA and NBO on the **6-9** at B3LYP\* level of theory.

| Comp.    |         | $q_N$  | $q_M$      | $r_{Y \cdots M}(\text{\AA})$ | $\chi$ | $E_{Y \cdots M}(\text{kJ/mole})$ | $E_{el}$ |
|----------|---------|--------|------------|------------------------------|--------|----------------------------------|----------|
| <b>6</b> | N2-Te1  | -0.558 | 0.661 (Te) | 3.08                         | 0.35   | 04.58                            | 39.69    |
|          | N3-Te1  | -0.557 |            | 3.12                         | 0.32   | 04.02                            | 39.18    |
| <b>7</b> | N1-Te   | -0.551 | 1.180 (Te) | 2.35                         | 0.80   | 70.38                            | 88.82    |
|          | N2-Te   | -0.555 |            | 2.37                         | 0.78   | 65.28                            | 89.83    |
| <b>8</b> | Te-1Hg1 |        | 1.190 (Te) | 4.15                         | -0.08  | 06.49                            | 89.43    |
|          | N1-Te6  | -0.552 | 0.940 (Hg) | 2.42                         | 0.78   | 65.79                            | 71.28    |
|          | N2-Te6  | -0.554 |            | 2.44                         | 0.78   | 61.00                            | 70.83    |
| <b>9</b> | N1-Pd   | -0.493 | 0.120 (Pd) | 2.21                         | 0.91   | 27.14                            | 08.87    |
|          | N2-Te   | -0.562 | 1.127 (Te) | 2.93                         | 0.45   | 09.38                            | 71.71    |
|          | N3-Te   | -0.558 |            | 3.01                         | 0.40   | 08.61                            | 69.44    |
|          | N4-Te   | -0.560 |            | 3.44                         | 0.11   | 01.76                            | 60.83    |

**Table S5** Cartesian coordinates for compound **6-9**.

**Compound 6**

|    |              |              |              |
|----|--------------|--------------|--------------|
| Te | 0.127082000  | 1.256449000  | -0.196147000 |
| N  | -0.498919000 | -1.969243000 | 3.355548000  |
| N  | -2.551204000 | 2.705360000  | -0.682414000 |
| C  | -1.570700000 | -0.012724000 | 0.308681000  |
| C  | -1.500640000 | -1.044588000 | 1.264346000  |
| C  | -2.637099000 | -1.830058000 | 1.498167000  |
| H  | -2.558604000 | -2.625786000 | 2.230375000  |
| C  | -3.834078000 | -1.581648000 | 0.841718000  |
| H  | -4.704398000 | -2.199430000 | 1.040440000  |
| C  | -3.916968000 | -0.518558000 | -0.051784000 |
| H  | -4.859750000 | -0.291794000 | -0.542019000 |
| C  | -2.799360000 | 0.270029000  | -0.325957000 |
| C  | -0.236521000 | -1.366306000 | 2.048365000  |
| H  | 0.372626000  | -2.069066000 | 1.472508000  |
| H  | 0.374433000  | -0.454149000 | 2.145594000  |
| C  | 0.669255000  | -2.668272000 | 3.870493000  |
| H  | 0.981637000  | -3.444828000 | 3.168676000  |
| H  | 0.419849000  | -3.151450000 | 4.818694000  |
| H  | 1.534002000  | -2.001735000 | 4.048208000  |
| C  | -0.992257000 | -0.991117000 | 4.316398000  |
| H  | -1.888313000 | -0.503371000 | 3.929479000  |
| H  | -0.247488000 | -0.205968000 | 4.544280000  |
| H  | -1.256656000 | -1.490024000 | 5.252138000  |
| C  | -2.931351000 | 1.426516000  | -1.292615000 |
| H  | -2.263189000 | 1.267560000  | -2.145789000 |
| H  | -3.960398000 | 1.462077000  | -1.691974000 |
| C  | -3.476640000 | 3.121168000  | 0.364539000  |
| H  | -3.103378000 | 4.028854000  | 0.843957000  |
| H  | -3.556515000 | 2.342779000  | 1.124118000  |
| H  | -4.490660000 | 3.329386000  | -0.022874000 |
| C  | -2.369231000 | 3.746337000  | -1.683756000 |
| H  | -2.038574000 | 4.668767000  | -1.200739000 |
| H  | -3.294122000 | 3.968863000  | -2.245453000 |
| H  | -1.597615000 | 3.441698000  | -2.394414000 |
| N  | 3.036936000  | 2.310900000  | 0.237101000  |
| N  | -0.021649000 | -2.931979000 | -2.723634000 |
| C  | 1.612161000  | -0.325355000 | -0.464981000 |
| C  | 2.856869000  | -0.154967000 | 0.175418000  |
| C  | 3.857184000  | -1.116238000 | 0.013542000  |
| H  | 4.811102000  | -0.977723000 | 0.514937000  |
| C  | 3.647096000  | -2.231057000 | -0.788615000 |
| H  | 4.429241000  | -2.974072000 | -0.910908000 |
| C  | 2.441332000  | -2.369496000 | -1.463071000 |

|   |              |              |              |
|---|--------------|--------------|--------------|
| H | 2.271706000  | -3.203708000 | -2.134012000 |
| C | 1.415749000  | -1.427105000 | -1.321950000 |
| C | 3.151140000  | 1.070376000  | 1.013090000  |
| H | 4.151883000  | 0.974941000  | 1.470711000  |
| H | 2.431093000  | 1.138373000  | 1.835194000  |
| C | 3.022994000  | 3.482313000  | 1.101578000  |
| H | 2.886340000  | 4.383740000  | 0.499529000  |
| H | 3.956308000  | 3.599266000  | 1.681508000  |
| H | 2.188326000  | 3.414090000  | 1.802835000  |
| C | 4.060770000  | 2.421001000  | -0.794853000 |
| H | 3.879103000  | 3.314930000  | -1.395817000 |
| H | 4.023626000  | 1.553804000  | -1.454759000 |
| H | 5.081383000  | 2.490258000  | -0.375636000 |
| C | 0.168882000  | -1.583704000 | -2.186009000 |
| H | -0.722429000 | -1.252108000 | -1.638886000 |
| H | 0.274840000  | -0.896090000 | -3.033320000 |
| C | -0.844689000 | -2.924189000 | -3.923947000 |
| H | -0.922424000 | -3.939400000 | -4.321579000 |
| H | -0.382172000 | -2.298894000 | -4.691409000 |
| H | -1.871386000 | -2.551497000 | -3.749541000 |
| C | -0.563205000 | -3.843664000 | -1.721850000 |
| H | 0.089159000  | -3.869378000 | -0.847056000 |
| H | -0.613292000 | -4.855571000 | -2.132162000 |
| H | -1.573891000 | -3.556123000 | -1.383084000 |

### Compound 7

|    |              |              |              |
|----|--------------|--------------|--------------|
| Te | 0.353423000  | 0.238741000  | -0.979114000 |
| Pd | -1.836229000 | -0.257081000 | 0.357351000  |
| Cl | -0.706172000 | -1.415793000 | 2.153182000  |
| Cl | -2.688262000 | 1.075414000  | -1.521614000 |
| Cl | -3.967208000 | -0.549981000 | 1.360912000  |
| N  | 0.583542000  | 2.447320000  | -0.015699000 |
| N  | 1.120246000  | -2.073756000 | -1.217388000 |
| C  | 2.106851000  | 0.124798000  | 0.189589000  |
| C  | 2.652978000  | -1.121310000 | 0.476284000  |
| C  | 3.835963000  | -1.170519000 | 1.214480000  |
| H  | 4.285494000  | -2.128100000 | 1.459558000  |
| C  | 4.429561000  | 0.010366000  | 1.661686000  |
| H  | 5.340007000  | -0.036771000 | 2.249323000  |
| C  | 3.863671000  | 1.250799000  | 1.365104000  |
| H  | 4.337791000  | 2.162148000  | 1.717380000  |
| C  | 2.693760000  | 1.313161000  | 0.608062000  |

|   |              |              |              |
|---|--------------|--------------|--------------|
| C | 2.054236000  | 2.607565000  | 0.157341000  |
| H | 2.253834000  | 3.425039000  | 0.858795000  |
| H | 2.466464000  | 2.903358000  | -0.812763000 |
| C | -0.107342000 | 2.479301000  | 1.301872000  |
| H | 0.061997000  | 3.451843000  | 1.777246000  |
| H | 0.270115000  | 1.684200000  | 1.942441000  |
| H | -1.174132000 | 2.326617000  | 1.152686000  |
| C | 0.018233000  | 3.479225000  | -0.917430000 |
| H | 0.165048000  | 4.475972000  | -0.488038000 |
| H | -1.045004000 | 3.287668000  | -1.052501000 |
| H | 0.510802000  | 3.428467000  | -1.888823000 |
| C | 1.893027000  | -2.346950000 | 0.030320000  |
| H | 2.557601000  | -3.203440000 | -0.133195000 |
| H | 1.170985000  | -2.606368000 | 0.808048000  |
| C | -0.029591000 | -3.000580000 | -1.352378000 |
| H | 0.325231000  | -4.035396000 | -1.411168000 |
| H | -0.583617000 | -2.764712000 | -2.261475000 |
| H | -0.690658000 | -2.889194000 | -0.494405000 |
| C | 1.992310000  | -2.139336000 | -2.410353000 |
| H | 2.375453000  | -3.156730000 | -2.546947000 |
| H | 2.834959000  | -1.458179000 | -2.291934000 |
| H | 1.425627000  | -1.853186000 | -3.296464000 |

### Compound 8

|    |              |              |              |
|----|--------------|--------------|--------------|
| Hg | -0.000015000 | -1.716178000 | -0.000344000 |
| Cl | -2.244988000 | -3.031049000 | -0.322290000 |
| Cl | -0.323829000 | -0.133310000 | 2.130687000  |
| Cl | 2.244999000  | -3.031143000 | 0.320919000  |
| Cl | 0.323706000  | -0.132246000 | -2.130588000 |
| Te | -3.781148000 | -0.024500000 | 0.295273000  |
| N  | -4.439171000 | -0.362793000 | -2.005535000 |
| N  | -4.000032000 | 1.181094000  | 2.406250000  |
| C  | -7.317171000 | 3.243465000  | -0.473969000 |
| H  | -8.107739000 | 3.966060000  | -0.645999000 |
| C  | -6.735740000 | 2.580220000  | -1.556425000 |
| H  | -7.074207000 | 2.793002000  | -2.566789000 |
| C  | -5.709328000 | 1.660900000  | -1.339787000 |
| C  | -5.298946000 | 1.399745000  | -0.035150000 |
| C  | -5.881764000 | 2.042427000  | 1.055724000  |
| C  | -6.888100000 | 2.981098000  | 0.828857000  |
| H  | -7.350120000 | 3.498954000  | 1.664981000  |
| C  | -5.423123000 | 1.608880000  | 2.428557000  |
| H  | -5.565974000 | 2.396084000  | 3.179370000  |
| H  | -6.011386000 | 0.741083000  | 2.745433000  |
| C  | -3.084920000 | 2.347191000  | 2.387590000  |

|    |              |              |              |
|----|--------------|--------------|--------------|
| H  | -2.061247000 | 1.992125000  | 2.277666000  |
| H  | -3.181871000 | 2.914078000  | 3.322053000  |
| H  | -3.336786000 | 2.996541000  | 1.549368000  |
| C  | -3.677074000 | 0.291118000  | 3.545001000  |
| H  | -4.317289000 | -0.590401000 | 3.510329000  |
| H  | -3.832768000 | 0.816798000  | 4.494903000  |
| H  | -2.636029000 | -0.021480000 | 3.467652000  |
| C  | -4.944872000 | 0.968647000  | -2.442527000 |
| H  | -5.545935000 | 0.851988000  | -3.352348000 |
| H  | -4.066100000 | 1.567183000  | -2.702766000 |
| C  | -5.513313000 | -1.383129000 | -2.032710000 |
| H  | -5.121378000 | -2.317210000 | -1.633293000 |
| H  | -5.855985000 | -1.542541000 | -3.062174000 |
| H  | -6.353269000 | -1.052144000 | -1.422253000 |
| C  | -3.299995000 | -0.794011000 | -2.857186000 |
| H  | -2.466968000 | -0.100543000 | -2.752939000 |
| H  | -3.620897000 | -0.838251000 | -3.904680000 |
| H  | -2.961716000 | -1.775351000 | -2.532608000 |
| Te | 3.781173000  | -0.024386000 | -0.295285000 |
| N  | 4.439282000  | -0.363690000 | 2.005344000  |
| N  | 3.999927000  | 1.182182000  | -2.405712000 |
| C  | 7.317235000  | 3.243238000  | 0.475243000  |
| H  | 8.107816000  | 3.965752000  | 0.647555000  |
| C  | 6.735845000  | 2.579524000  | 1.557433000  |
| H  | 7.074358000  | 2.791860000  | 2.567876000  |
| C  | 5.709423000  | 1.660297000  | 1.340435000  |
| C  | 5.298982000  | 1.399720000  | 0.035702000  |
| C  | 5.881749000  | 2.042885000  | -1.054914000 |
| C  | 6.888103000  | 2.981447000  | -0.827679000 |
| H  | 7.350085000  | 3.499673000  | -1.663596000 |
| C  | 5.423020000  | 1.609972000  | -2.427916000 |
| H  | 5.565821000  | 2.397530000  | -3.178368000 |
| H  | 6.011263000  | 0.742325000  | -2.745240000 |
| C  | 3.084838000  | 2.348283000  | -2.386427000 |
| H  | 2.061163000  | 1.993188000  | -2.276614000 |
| H  | 3.181746000  | 2.915631000  | -3.320615000 |
| H  | 3.336769000  | 2.997210000  | -1.547898000 |
| C  | 3.676881000  | 0.292748000  | -3.544862000 |
| H  | 4.317077000  | -0.588802000 | -3.510645000 |
| H  | 3.832535000  | 0.818871000  | -4.494526000 |
| H  | 2.635834000  | -0.019864000 | -3.467607000 |
| C  | 4.945010000  | 0.967558000  | 2.442901000  |
| H  | 5.546109000  | 0.850497000  | 3.352646000  |
| H  | 4.066250000  | 1.565983000  | 2.703432000  |
| C  | 5.513417000  | -1.384043000 | 2.032044000  |
| H  | 5.121473000  | -2.317945000 | 1.632215000  |

|   |             |              |             |
|---|-------------|--------------|-------------|
| H | 5.856105000 | -1.543918000 | 3.061431000 |
| H | 6.353365000 | -1.052786000 | 1.421722000 |
| C | 3.300123000 | -0.795275000 | 2.856835000 |
| H | 2.467100000 | -0.101753000 | 2.752914000 |
| H | 3.621050000 | -0.839977000 | 3.904301000 |
| H | 2.961824000 | -1.776469000 | 2.531834000 |

### Compound 9

|    |              |              |              |
|----|--------------|--------------|--------------|
| Pd | -2.127779000 | 0.067818000  | 0.130407000  |
| Te | 0.398713000  | 0.053929000  | -0.737606000 |
| Cl | -4.470734000 | 0.246747000  | 0.658873000  |
| N  | -1.654670000 | -0.118698000 | 2.285021000  |
| C  | 1.464627000  | 1.544743000  | 0.497999000  |
| C  | 0.717679000  | -1.635187000 | 0.605802000  |
| Cl | -2.688382000 | -0.038394000 | -2.163725000 |
| N  | 0.105143000  | -2.498974000 | -2.150449000 |
| C  | 0.406713000  | -1.564509000 | 1.973895000  |
| C  | 0.895512000  | 2.832151000  | 0.583432000  |
| N  | -0.180929000 | 2.863603000  | -1.637973000 |
| C  | 0.650120000  | -2.684188000 | 2.779550000  |
| H  | 0.430917000  | -2.629749000 | 3.841789000  |
| C  | 1.499653000  | 3.805551000  | 1.384255000  |
| H  | 1.049875000  | 4.791976000  | 1.445360000  |
| N  | 3.803347000  | -0.362355000 | -0.420969000 |
| C  | 1.141970000  | -3.865908000 | 2.238758000  |
| H  | 1.319286000  | -4.725801000 | 2.876156000  |
| C  | 2.672473000  | 3.533923000  | 2.074646000  |
| H  | 3.132714000  | 4.292637000  | 2.699098000  |
| C  | 3.281409000  | 2.297938000  | 1.908253000  |
| H  | 4.235308000  | 2.102960000  | 2.389105000  |
| C  | 1.356592000  | -3.952114000 | 0.867230000  |
| H  | 1.680905000  | -4.890593000 | 0.426817000  |
| C  | 2.709517000  | 1.294389000  | 1.115149000  |
| C  | 1.141378000  | -2.848545000 | 0.039136000  |
| C  | -0.322806000 | 3.225667000  | -0.224532000 |
| H  | -1.218275000 | 2.713051000  | 0.144974000  |
| H  | -0.503049000 | 4.307428000  | -0.102860000 |
| C  | -0.206233000 | -0.338008000 | 2.610846000  |
| H  | -0.125959000 | -0.425920000 | 3.701946000  |
| H  | 0.322425000  | 0.567509000  | 2.326368000  |
| C  | 3.513152000  | 0.013285000  | 0.966185000  |
| H  | 4.451659000  | 0.138426000  | 1.535910000  |
| H  | 2.986967000  | -0.825364000 | 1.426004000  |
| C  | 1.304027000  | -2.976671000 | -1.461829000 |
| H  | 2.142152000  | -2.356111000 | -1.793969000 |

|   |              |              |              |
|---|--------------|--------------|--------------|
| H | 1.549768000  | -4.019467000 | -1.726410000 |
| C | -2.452151000 | -1.257904000 | 2.811482000  |
| H | -2.165452000 | -2.174732000 | 2.300783000  |
| H | -3.505444000 | -1.068776000 | 2.630318000  |
| H | -2.268959000 | -1.373729000 | 3.888336000  |
| C | 0.951443000  | 3.530573000  | -2.279248000 |
| H | 1.030804000  | 3.187807000  | -3.312600000 |
| H | 1.883763000  | 3.291546000  | -1.766725000 |
| H | 0.837154000  | 4.628200000  | -2.289858000 |
| C | -2.086720000 | 1.129628000  | 2.962858000  |
| H | -3.132642000 | 1.314153000  | 2.731258000  |
| H | -1.484871000 | 1.964746000  | 2.605221000  |
| H | -1.956255000 | 1.038136000  | 4.049430000  |
| C | -1.417674000 | 3.156507000  | -2.367852000 |
| H | -1.622973000 | 4.240415000  | -2.391882000 |
| H | -2.259067000 | 2.641889000  | -1.909622000 |
| H | -1.333091000 | 2.795868000  | -3.393521000 |
| C | 4.534035000  | 0.675104000  | -1.142492000 |
| H | 5.520547000  | 0.890198000  | -0.693213000 |
| H | 3.961337000  | 1.602465000  | -1.161842000 |
| H | 4.694364000  | 0.354992000  | -2.174279000 |
| C | -1.061975000 | -3.352112000 | -1.931463000 |
| H | -1.942566000 | -2.871463000 | -2.355844000 |
| H | -1.236950000 | -3.481104000 | -0.862975000 |
| H | -0.935423000 | -4.349753000 | -2.386462000 |
| C | 4.543982000  | -1.618715000 | -0.451647000 |
| H | 4.706869000  | -1.929552000 | -1.486302000 |
| H | 3.979206000  | -2.401386000 | 0.057705000  |
| H | 5.532824000  | -1.539583000 | 0.035851000  |
| C | 0.332468000  | -2.260739000 | -3.570799000 |
| H | 0.582571000  | -3.184124000 | -4.120139000 |
| H | 1.151309000  | -1.548971000 | -3.702018000 |
| H | -0.567394000 | -1.828326000 | -4.009685000 |
